# Supplementary material
Source: MDPI journal article supplement (https://www.mdpi.com/2076-0752/11/6/125)
Supplement: s1 [file s1]

## Supplementary materials

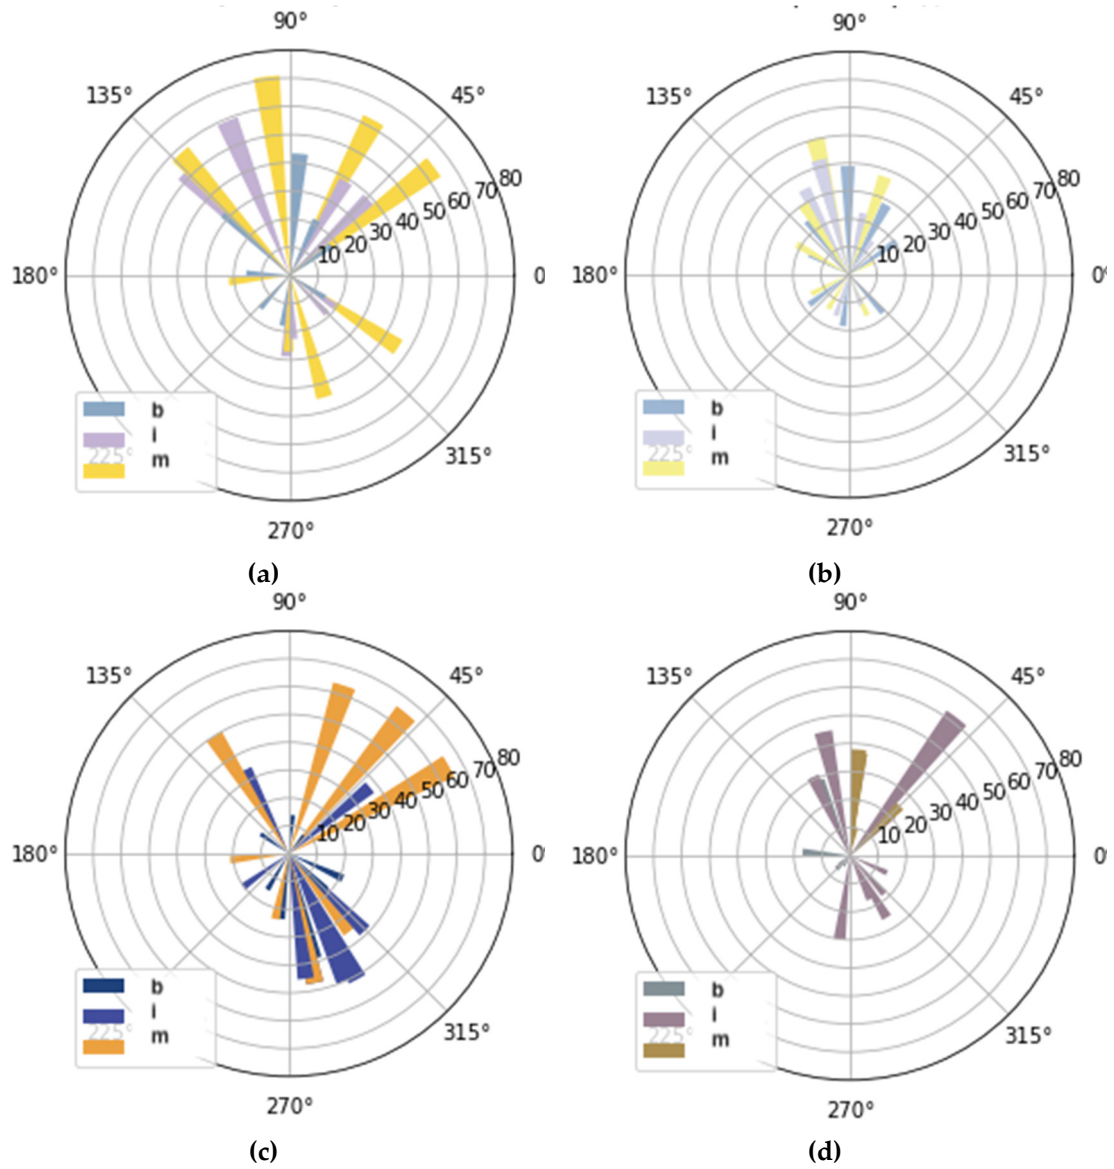

**Figure S1.** A circular histogram of the hue and chroma distributions for the background (b), intermediary (i), and main (m) colors for the Section I (a), II (b), III (c), and IV (d); the bars are colored as in charts 1, 9, 17, and 25, respectively (the first charts of each section).

**Table S1.** Length of sides, perimeters, and areas of color triangles plotted in CIELAB.

| Section | Chart | Length of sides (CIEDE2000, $\Delta E^*00$ ) |                 |                           | Perimeter | Area   |
|---------|-------|----------------------------------------------|-----------------|---------------------------|-----------|--------|
|         |       | main-"intermediary"                          | main-background | background-"intermediary" |           |        |
| I       | 1     | 46.80                                        | 47.75           | 19.56                     | 114.11    | 451.83 |
|         | 2     | 43.41                                        | 38.55           | 13.48                     | 95.44     | 254.14 |
|         | 3     | 62.70                                        | 45.26           | 23.62                     | 131.59    | 419.68 |
|         | 4     | 76.52                                        | 64.21           | 16.79                     | 157.52    | 398.44 |
|         | 5     | 52.62                                        | 55.24           | 14.54                     | 122.40    | 382.11 |
|         | 6     | 51.37                                        | 39.22           | 14.69                     | 105.27    | 184.34 |
|         | 7     | 46.69                                        | 43.97           | 17.88                     | 108.54    | 392.56 |
|         | 8     | 44.21                                        | 46.41           | 20.92                     | 111.55    | 458.68 |
| II      | 9     | 36.60                                        | 43.34           | 12.72                     | 92.66     | 212.94 |
|         | 10    | 32.05                                        | 32.67           | 11.37                     | 76.09     | 180.86 |
|         | 11    | 27.96                                        | 28.31           | 14.68                     | 70.95     | 199.25 |
|         | 12    | 38.63                                        | 28.77           | 13.49                     | 80.88     | 151.98 |
|         | 13    | 26.28                                        | 31.73           | 9.13                      | 67.14     | 104.90 |
|         | 14    | 26.35                                        | 30.83           | 11.13                     | 68.32     | 142.96 |
|         | 15    | 24.68                                        | 35.67           | 19.32                     | 79.67     | 227.02 |
|         | 16    | 25.43                                        | 39.05           | 16.27                     | 80.76     | 139.00 |
| III     | 17    | 60.88                                        | 63.99           | 7.48                      | 132.35    | 212.05 |
|         | 18    | 49.06                                        | 50.87           | 12.09                     | 112.02    | 296.49 |
|         | 19    | 51.35                                        | 44.73           | 12.80                     | 108.88    | 260.79 |
|         | 20    | 53.18                                        | 29.31           | 27.47                     | 109.96    | 264.07 |
|         | 21    | 37.59                                        | 36.01           | 21.85                     | 95.45     | 382.91 |
|         | 22    | 20.98                                        | 23.18           | 23.84                     | 68.00     | 220.57 |
|         | 23    | 29.93                                        | 38.23           | 20.43                     | 88.58     | 303.45 |
|         | 24    | 56.44                                        | 60.29           | 29.07                     | 145.79    | 814.28 |
| IV      | 25    | 30.85                                        | 25.38           | 20.03                     | 76.27     | 253.15 |
|         | 26    | 19.77                                        | 11.85           | 16.10                     | 47.72     | 95.36  |
|         | 27    | 17.97                                        | 13.82           | 8.77                      | 40.57     | 59.05  |
|         | 28(1) | 25.26                                        | 25.56           | 5.72                      | 56.54     | 72.14  |
|         | 28(2) | 13.52                                        | 25.56           | 24.63                     | 63.71     | 162.97 |
|         | 29(1) | 17.44                                        | 25.56           | 22.31                     | 65.31     | 190.92 |
|         | 29(2) | 34.55                                        | 25.56           | 16.29                     | 76.41     | 196.62 |
|         | 30(1) | 41.10                                        | 46.66           | 27.43                     | 115.19    | 559.84 |
|         | 30(2) | 42.72                                        | 46.66           | 22.03                     | 111.41    | 469.41 |
|         | 30(3) | 29.70                                        | 46.66           | 39.38                     | 115.75    | 581.39 |

**Table S2.** Angle values of color triangles plotted in CIELAB.

| Section | Chart | Angles (degrees, °) |       |            |
|---------|-------|---------------------|-------|------------|
|         |       | "intermediary"      | main  | background |
| I       | 1     | 23.85               | 80.81 | 75.34      |
|         | 2     | 17.68               | 60.29 | 102.03     |
|         | 3     | 17.20               | 34.52 | 128.28     |
|         | 4     | 9.33                | 38.34 | 132.33     |
|         | 5     | 15.24               | 92.65 | 72.11      |
|         | 6     | 10.55               | 29.25 | 140.20     |

|     |       |       |        |        |
|-----|-------|-------|--------|--------|
| II  | 7     | 22.48 | 70.15  | 87.36  |
|     | 8     | 26.56 | 82.61  | 70.84  |
|     | 9     | 15.58 | 113.87 | 50.56  |
|     | 10    | 20.21 | 82.98  | 76.81  |
|     | 11    | 30.23 | 76.24  | 73.54  |
|     | 12    | 15.87 | 35.69  | 128.43 |
|     | 13    | 14.57 | 119.03 | 46.40  |
|     | 14    | 20.60 | 103.00 | 56.40  |
|     | 15    | 31.05 | 107.73 | 41.22  |
|     | 16    | 16.26 | 137.80 | 25.94  |
| III | 17    | 6.25  | 111.36 | 62.40  |
|     | 18    | 13.75 | 91.64  | 74.62  |
|     | 19    | 13.13 | 52.51  | 114.37 |
|     | 20    | 19.81 | 21.19  | 139.00 |
|     | 21    | 34.45 | 68.80  | 76.74  |
|     | 22    | 65.15 | 61.88  | 52.97  |
|     | 23    | 32.04 | 96.97  | 50.99  |
|     | 24    | 28.60 | 83.08  | 68.32  |
| IV  | 25    | 40.28 | 55.00  | 84.72  |
|     | 26    | 54.52 | 36.80  | 88.68  |
|     | 27    | 28.39 | 48.49  | 103.12 |
|     | 28(1) | 12.91 | 86.60  | 80.49  |
|     | 28(2) | 70.58 | 78.24  | 31.18  |
|     | 29(1) | 58.94 | 79.02  | 42.04  |
|     | 29(2) | 26.44 | 44.31  | 109.26 |
|     | 30(1) | 35.72 | 83.25  | 61.03  |
|     | 30(2) | 28.10 | 85.94  | 65.96  |
|     | 30(3) | 57.03 | 83.71  | 39.26  |
